# Supplementary material
Source: PubMed Central journal article supplement (PMC7193514)
Supplement: f-76-00216-sup1.pdf [file f-76-00216-sup1.pdf]

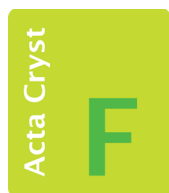

STRUCTURAL BIOLOGY  
COMMUNICATIONS

**Volume 76 (2020)**

**Supporting information for article:**

**Crystallographic snapshots of the EF-hand protein MCFD2  
complexed with the intracellular lectin ERGIC-53 involved in  
glycoprotein transport**

**Tadashi Satoh, Miho Nishio, Kousuke Suzuki, Maho Yagi-Utsumi, Yukiko  
Kamiya, Tsunehiro Mizushima and Koichi Kato**
